# Supplementary material for: Ultrasensitive Determination of Natural Flavonoid Rutin Using an Electrochemical Sensor Based on Metal-Organic Framework CAU−1/Acidified Carbon Nanotubes Composites
Source: MDPI journal article supplement (doi:10.3390/molecules27227761), 2022-11-11
Supplement: s1 [file s1]

# Ultrasensitive determination of natural flavonoid rutin using an electrochemical sensor based on metal-organic framework CAU-1/acidified carbon nanotubes composites

Yuhong Li <sup>1,§</sup>, Jianxiong Tang <sup>1,§</sup>, Yueli Lin <sup>1</sup>, Jiejun Li <sup>1</sup>, Yaqi Yang <sup>1</sup>, Pengcheng Zhao <sup>2</sup>, Junjie Fei <sup>1,3,\*</sup> and Yixi Xie <sup>1,2,\*</sup>

<sup>1</sup> Key Laboratory of Environmentally Friendly Chemistry and Applications of Ministry of Education, College of Chemistry, Xiangtan University, Xiangtan 411105, People's Republic of China;

<sup>2</sup> Key Laboratory for Green Organic Synthesis and Application of Hunan Province, Xiangtan University, Xiangtan 411105, People's Republic of China;

<sup>3</sup> Hunan Institute of Advanced Sensing and Information Technology, Xiangtan University, Xiangtan 411105, People's Republic of China;

\* Correspondence: Junjie Fei, [fei\\_junjie@xtu.edu.cn](mailto:fei_junjie@xtu.edu.cn); Yixi Xie, [xieyixige@xtu.edu.cn](mailto:xieyixige@xtu.edu.cn).

§ These authors contributed equally to this work.

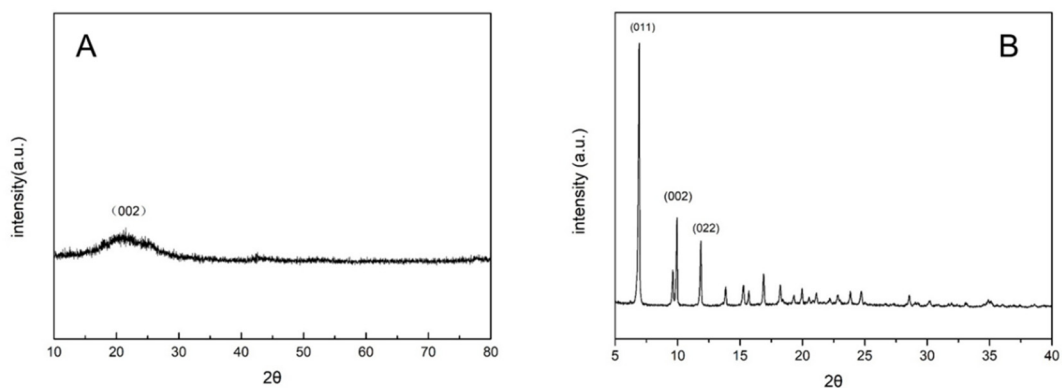

**Figure.S1.**XRD patterns of (A) MWCNTs and (B) CAU-1

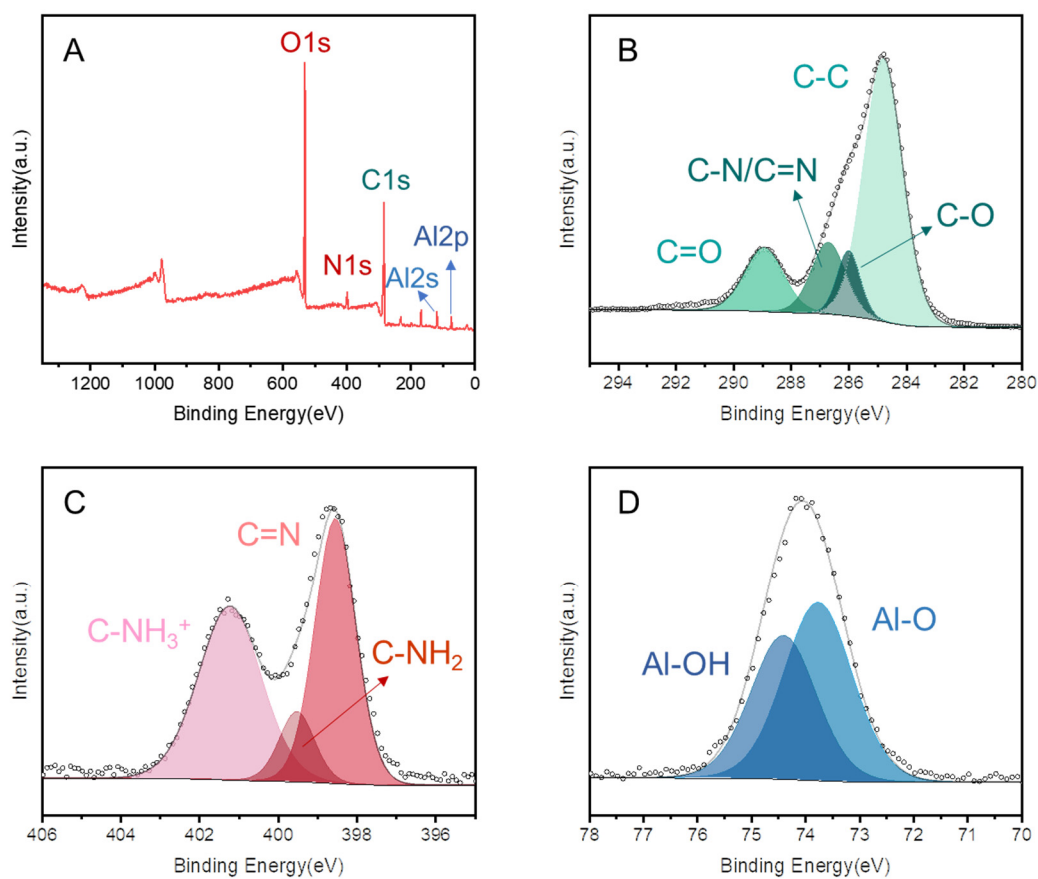

**Figure.S2.** XPS survey of the CAU-1(A) and High-resolution XPS spectra of (B) CAU-1-C1s, (C)CAU-1-N1s, (D)CAU-1-Al2p

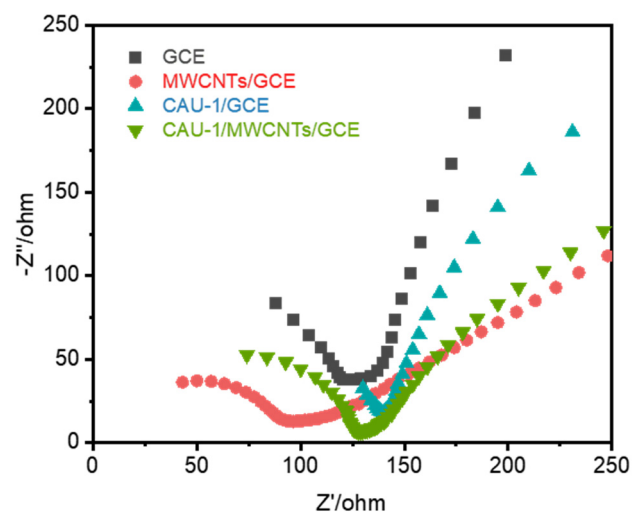

**Figure.S3** EIS spectra of different electrode materials, supporting electrolyte solution: 1 mM  $\text{Fe}(\text{CN})_6^{3-/4-}$  (containing 0.1 M KCl)

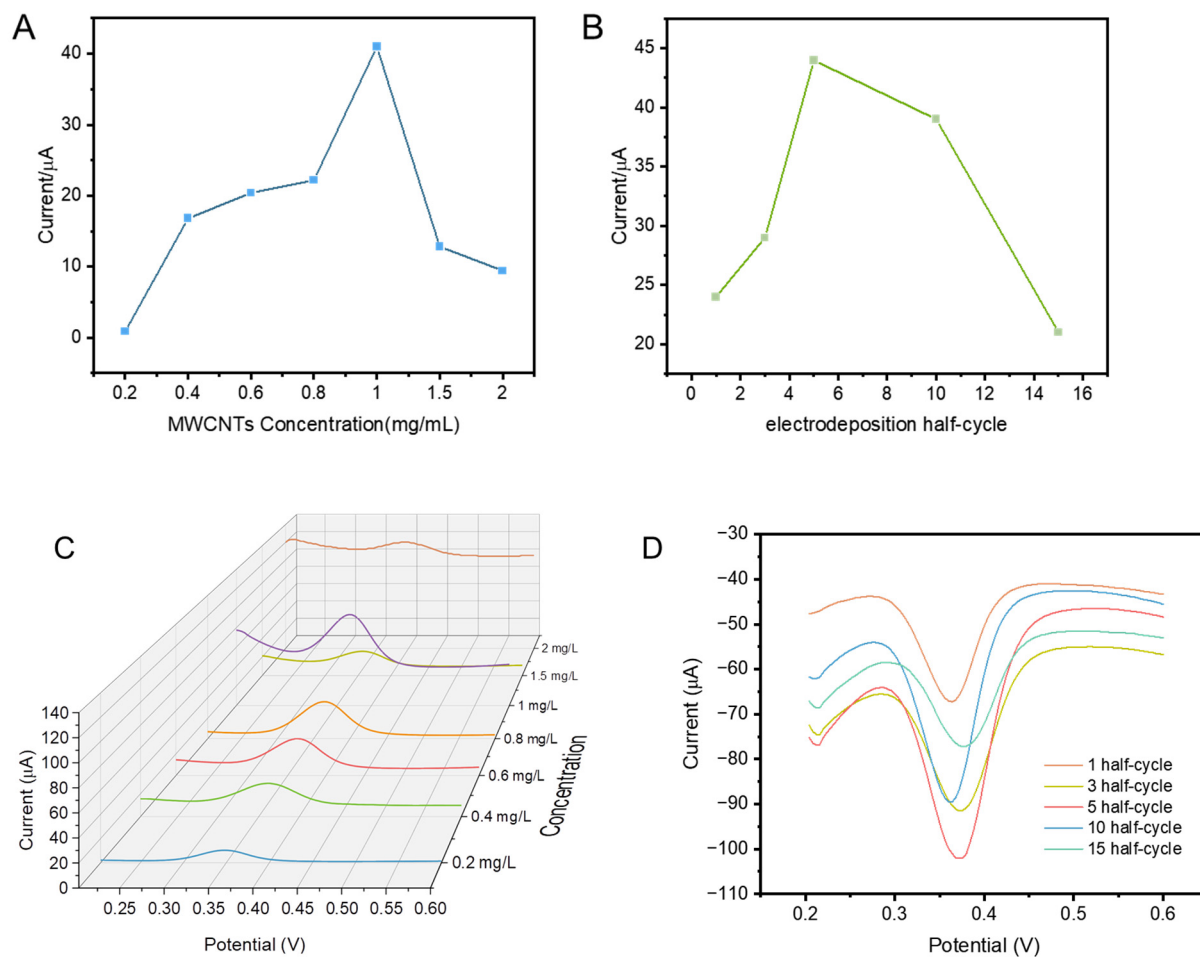

**Figure.S4.** (A) Peak current values and (C) DPV current responses when the carbon tube concentrations are 0.2, 0.4, 0.6, 0.8, 1.0, 1.5, and 2.0  $\text{mg}\cdot\text{mL}^{-1}$ . (B) The peak current values and (D) DPV current responses when the electrodeposition half-cycles are 1, 3, 5, 10, and 15.

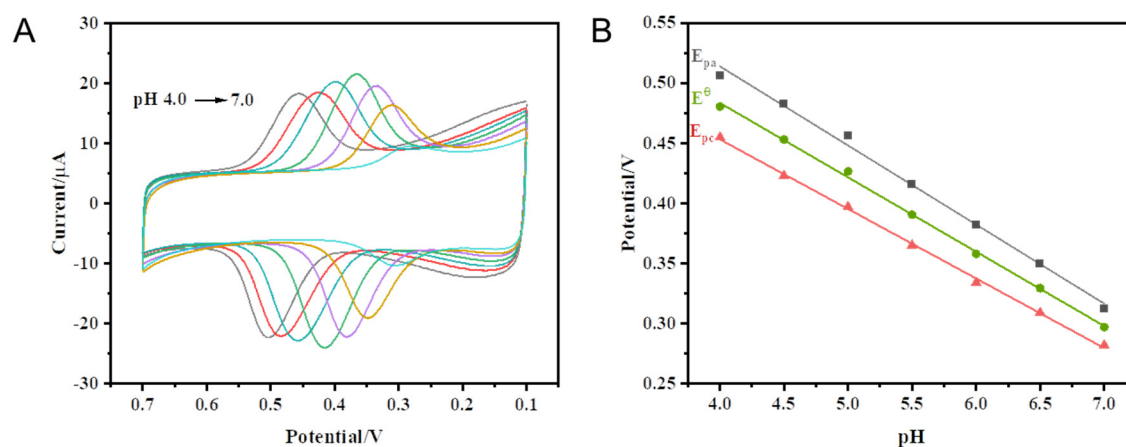

**Figure.S5.** (A) Cyclic voltammetry curves of CAU-1/MWCNTs/GCE at different pH (4.0, 4.5, 5.0, 5.5, 6.0, 6.5, 7.0) to 2  $\mu$ M rutin. (B) Linear relationship between pH and redox potential picture

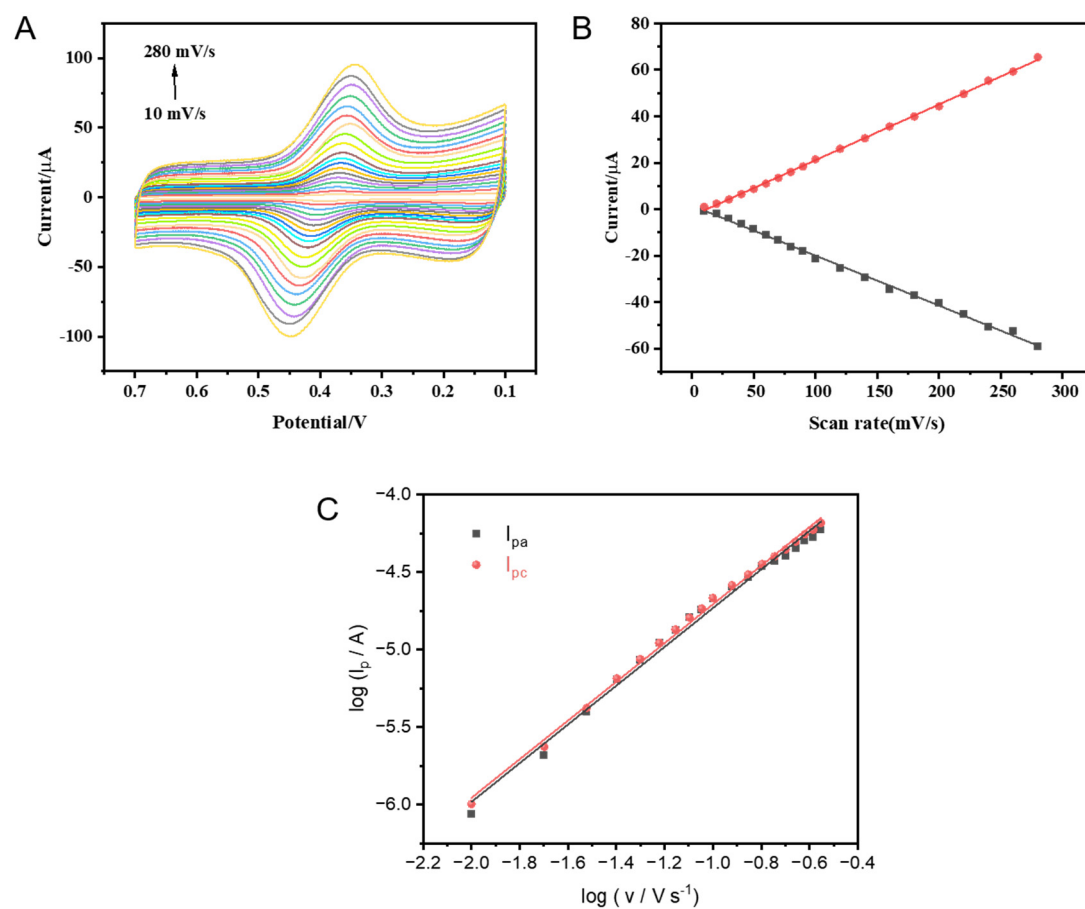

**Figure.S6.** (A) Different scan rates (at: 5, 10, 20, 30, 40, 50, 60, 70, 80, 90, 100, 120, 140, 160, 180, 200, 220, 240, 260, 280) of CAU-1/MWCNTs/GCE in the presence of 2  $\mu$ M rutin. (B) Linear relationship between scan rate and oxidation peak and reduction peak current. (C) Logarithm of peak current vs. logarithm of scan rate

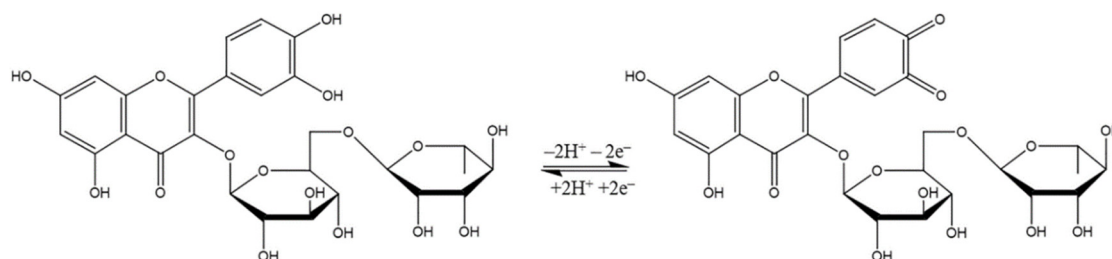

**Figure.S7.** The proposed mechanism of electrochemical oxidation of rutin.

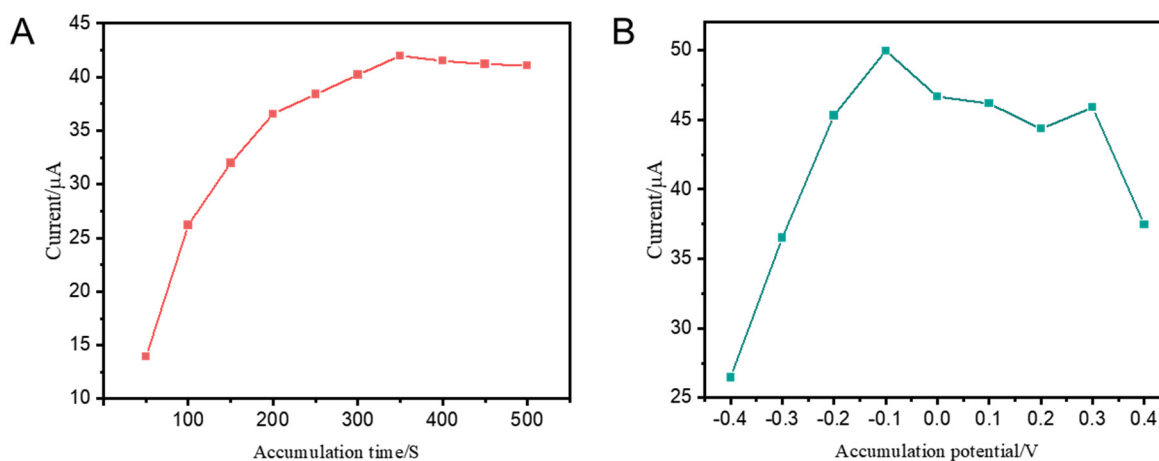

**Figure.S8.** (A) Schematic diagram of peak current changing with accumulation time (B) Schematic diagram of peak current changing with accumulation potential

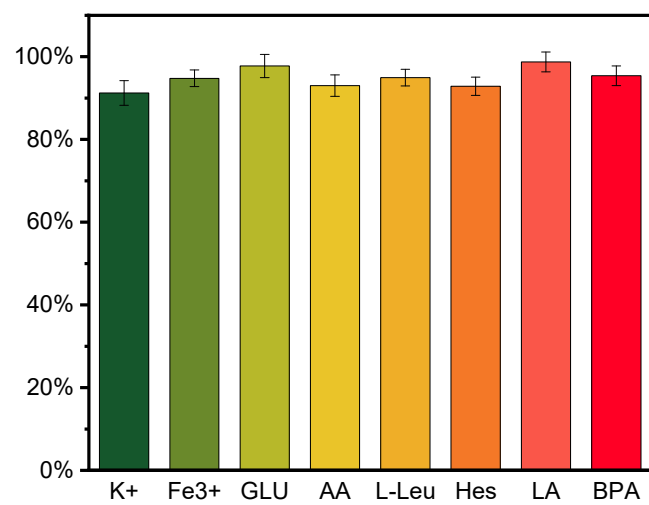

**Figure.S9.** Relative magnitude of electrochemical response signals of CAU-1/MWCNTs/GCE to 1  $\mu$ M rutin in the presence of different interfering substances in PBS solution
